# Supplementary material for: To senesce or not to senesce: how primary human fibroblasts decide their cell fate after DNA damage
Source: PubMed Central journal article supplement (PMC4761720; doi:10.18632/aging.100883), 2016-01-30
Supplement: aging-08-158-s001.pdf [file aging-08-158-s001.pdf]

## **SUPPLEMENTAL DATA**

Please browse the Full text version of this manuscript  
to see:

- COPASI models
- Data Sets 1-14,
- Supplemental Methods,
- Supplemental Figures
- Supplemental Tables.
